# Supplementary material
Source: MDPI journal article supplement (https://www.mdpi.com/1999-5903/15/1/38)
Supplement: s1 [file s1]

## **Supplementary Material S1: Script for the interviews with Blockchain experts**

### First phase of data collection

Personal data of the interviewee:

Name:.....

Education:.....

Working area:.....

Employment Organization:.....

Guiding questions for the interview:

1. What is the potential for the application of Blockchain in agribusiness supply chains in Brazil?
2. What are the biggest difficulties for the development of Blockchain technology?
3. What is the relationship between innovation in business models in agribusiness supply chains and the adoption of Blockchain technology?
4. What strategies could minimize transaction costs between ties in agribusiness supply chains by adopting Blockchain technology?
5. What are the challenges and barriers to the development, acquisition, and use of Blockchain technology in Brazilian agribusiness?
6. What are the opportunities and benefits of Blockchain technology for agribusiness sectors?
7. What are the advantages and disadvantages of using Blockchain technology in agribusiness sectors?
